# Supplementary material for: Comparative genomic hybridizations reveal absence of large Streptomyces coelicolor genomic islands in Streptomyces lividans
Source: PubMed Central journal article supplement (PMC1934918; doi:10.1186/1471-2164-8-229), 2007-07-10
Supplement: 1471-2164-8-229-S1.pdf [file 1471-2164-8-229-S1.pdf]

## PCR VERIFICATION FOR GENOMIC ISLANDS – PRIMERS USED AND GEL IMAGES

**Table S1: Primers used for PCR verification of Genomic Islands**

| Genomic island <sup>a</sup> | Left primer (5'-3')       | Right primer (5'-3')      |
|-----------------------------|---------------------------|---------------------------|
| <b>GI-1</b>                 | TAGCTGATGAGGATCACCAGGTCAC | AAGATCGCGAGTATCGAGACCTATC |
| Gi-2                        | TGCTCGGGTACGTGTTCAG       | AGGTGCTGGTGTGGGAGAT       |
| Gi-3                        | GGTGAAGTAGATGTGGTTCATCAGG | ACCCGTACCAGATGGTCAAGGAC   |
| Gi-4                        | GCTGTAGTCGAGGACGCTCAGGT   | GGTGGAGTACGACCAGGAGTATGTC |
| <b>GI-2</b>                 | GCCGGGAGACCGACCTCTAC      | CGGTGCCGGTCTTTTCGAC       |
| Gi-5                        | ATCACAGAGCAGTTCGGTGGTACG  | GCTGGTTGTAGAAGACGAAGTCACC |
| Gi-6                        | GAGGTTCTGTATCGACGCCTACT   | GAGAAGGTGATGGTGTACGTGAAGG |
| Gi-7                        | ATGAACGAGTCGGCACATTCCAC   | CTGAACAGGTACGCGTGATTGAC   |
| Gi-8                        | AACTCAACGCCGAGTTCAAG      | GGTGGTCTCCTTCGAGATGT      |
| Gi-9                        | AGAGTGGGCCAGCAGAACT       | GCGTAGTCGAGTGCTGACC       |
| Gi-10                       | ACCTACTCCCCGGTCTTCAC      | ACGAACTACCAAGCAGGTC       |
| Gi-11                       | ACCTTCGAGACGATGTCGAAACTG  | GACGAGATCTTCGACGTCTACCTG  |
| Gi-12                       | TAGGCTCACTCGAGCTATCCATCCT | ACTTCCAGACACTCGGCACCATC   |
| Gi-13                       | ATCCAGACCCACGGAGGAG       | GTCTTGTACGACCCGCACAG      |
| Gi-14                       | CTCGAAGTAGGACGTGGAGAACAG  | GAATGTGAGTTCTCCGGGCTTAG   |
| Gi-15                       | CTGGGCGTAGGGCTGGTTG       | ACCATGGTGTGTCGTCCAGGTA    |
| Gi-16                       | ATCAGCCCGCAGGAGTACC       | CGGTGACGTAGACCAGTTTCG     |
| Gi-17                       | CGGTCGCCTGGACCTCAAC       | GGCTGACCCTCGCCTACCTG      |
| <b>GI-3</b>                 | ATGCGCGTGGTGTTCGTG        | GCGTTCAGCCCGAGTCC         |
| <b>GI-4</b>                 | AAGGAGAAGTGGTCCCTGAAAGC   | AGGCTGAACTCCAGGTCCTGTC    |
| <b>GI-5</b>                 | CTCGAACACTCTCGGACGACTT    | GAAGTAGGAGGCGCAGTAGACCAG  |

<sup>a</sup> PCR products for Gi-1 and Gi-18 which are close to the chromosome ends could not be amplified (possibly due to genome rearrangements that might have occurred in *S. lividans*). Hence those primers are not shown here.

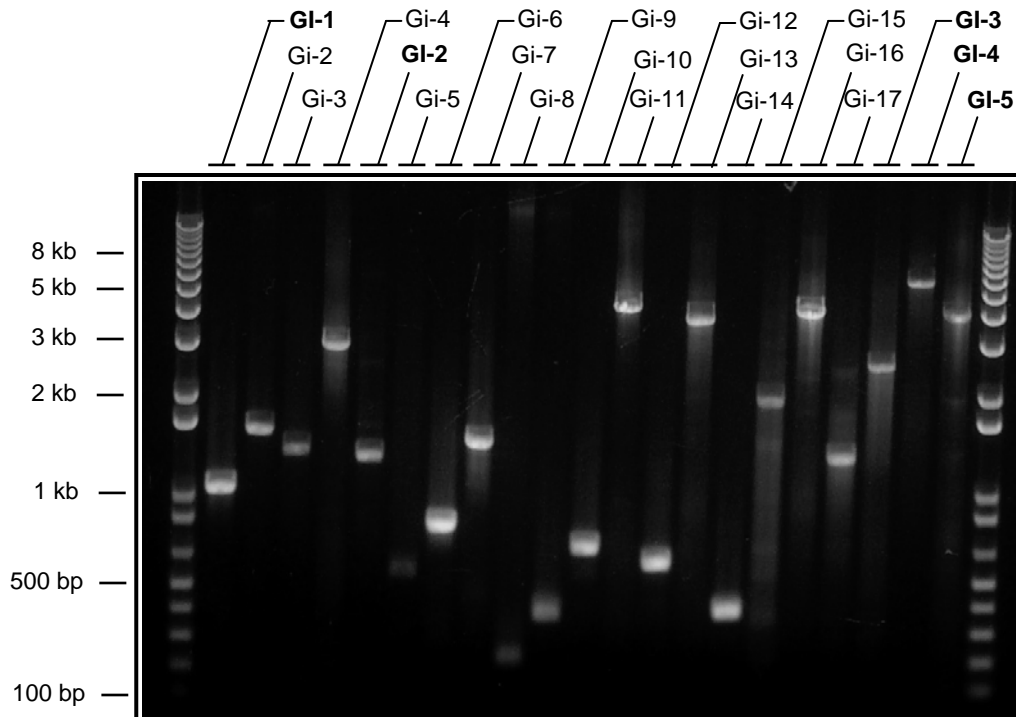

**Figure S1: Gel electrophoresis image of PCR products amplified from *S. lividans* genomic DNA using primers listed in Table 1**
